# Supplementary material for: Mannose glycosylation is an integral step for NIS localization and function in human breast cancer cells
Source: Oxford University Press journal article supplement (doi:10.1242/jcs.232058), 2019-08-27
Supplement: jcs232058supp.pdf [file jcs232058supp.pdf]

## S1A

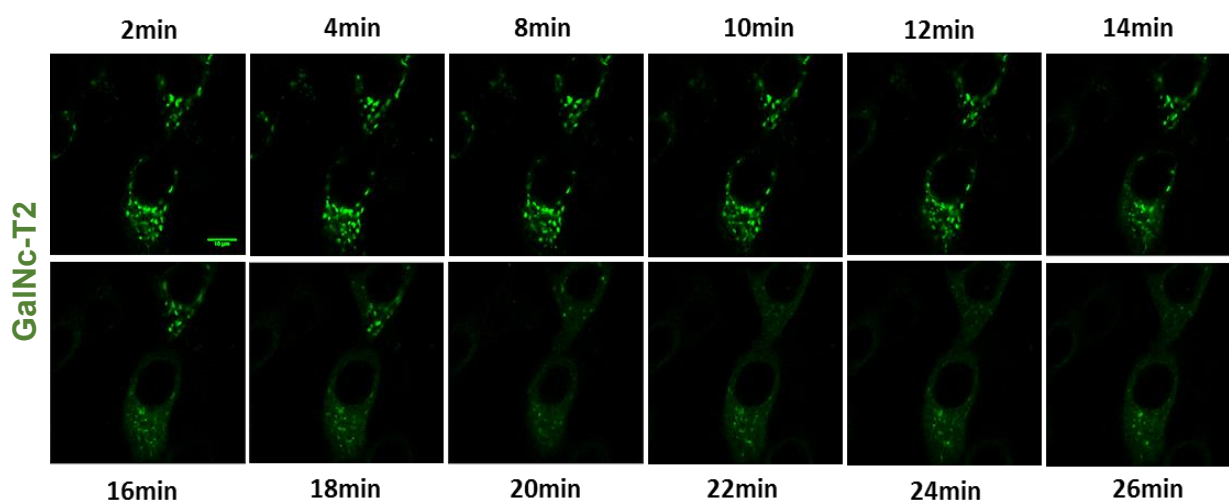

## S1B

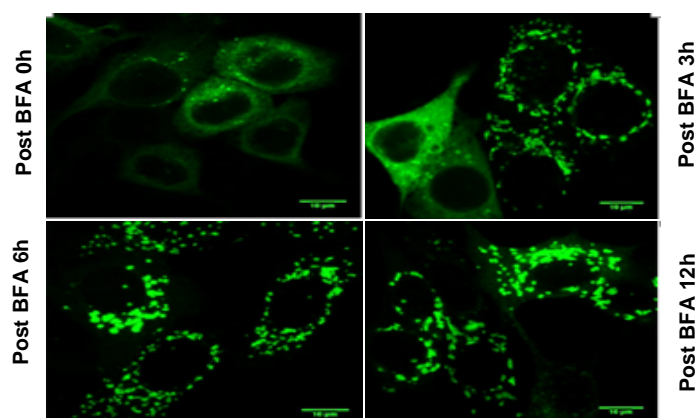

**Figure S1: Effect of Brefeldin A (BFA) on Golgi deformation/reformation kinetics.**

**S1A.** Live cell imaging of GalNac-T2-GFP (green) reporter at different time intervals, post BFA treatment, in MCF-7 cells (Live cell movie split into images). **S2B.** Golgi rescue kinetics, post BFA withdrawal in MCF-7 cells, as seen by GalNac-T2-GFP (green) reporter. The scale bar represents 10 $\mu$ m.

S2A

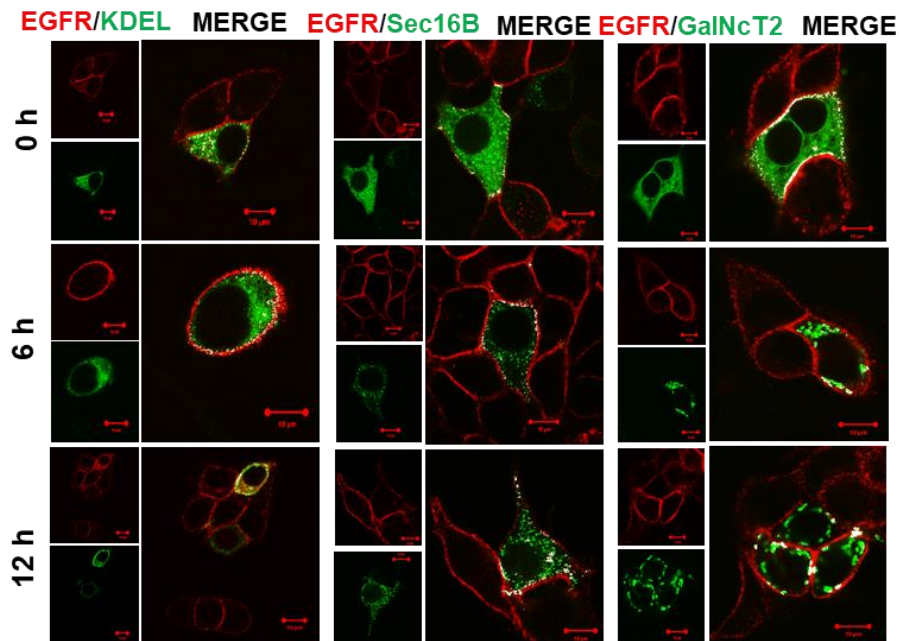

S2B

S2C

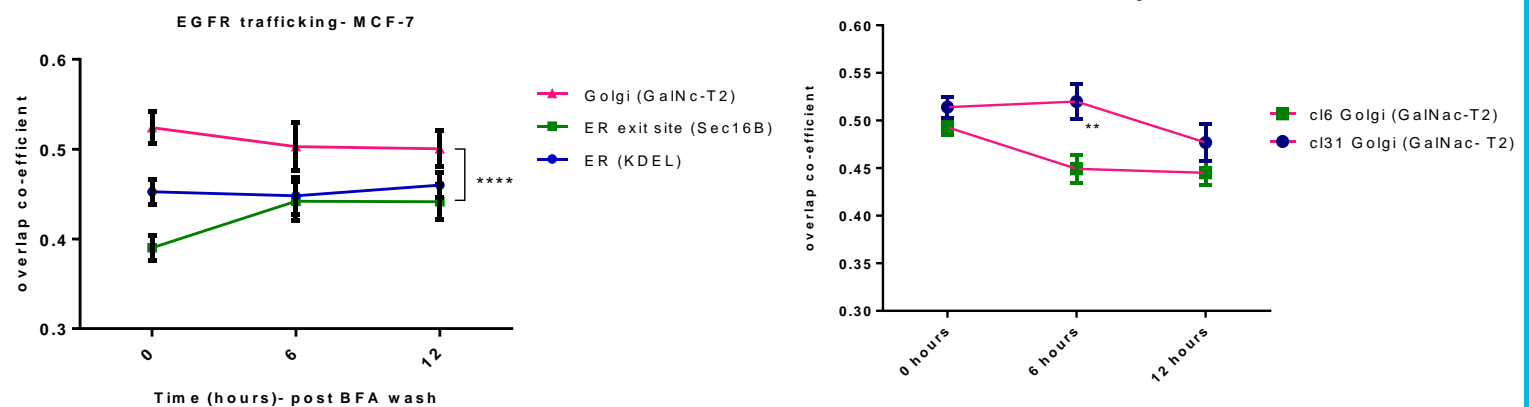

**Figure S2: The trafficking of EGFR through Golgi across the clonal model systems.**

**S2A.** Co-localization of EGFR (red) with GalNac T2 (green) respectively in MCF-7 cells. All images represent a single plane. White spots are the points of co-localization between the two channels. The scale bar represents 10μm. **S2B.** Chart showing overlap co-efficients values obtained for EGFR with GalNac T2, Sec16B, and KDEL in MCF-7 cells. The middle best plane was used for quantification. Error bars indicate SEM. **S2C.** Chart showing overlap co-efficients values obtained for EGFR with GalNac T2 in cl31 and cl6 cells. The middle best plane was used for quantification. Error bars indicate SEM

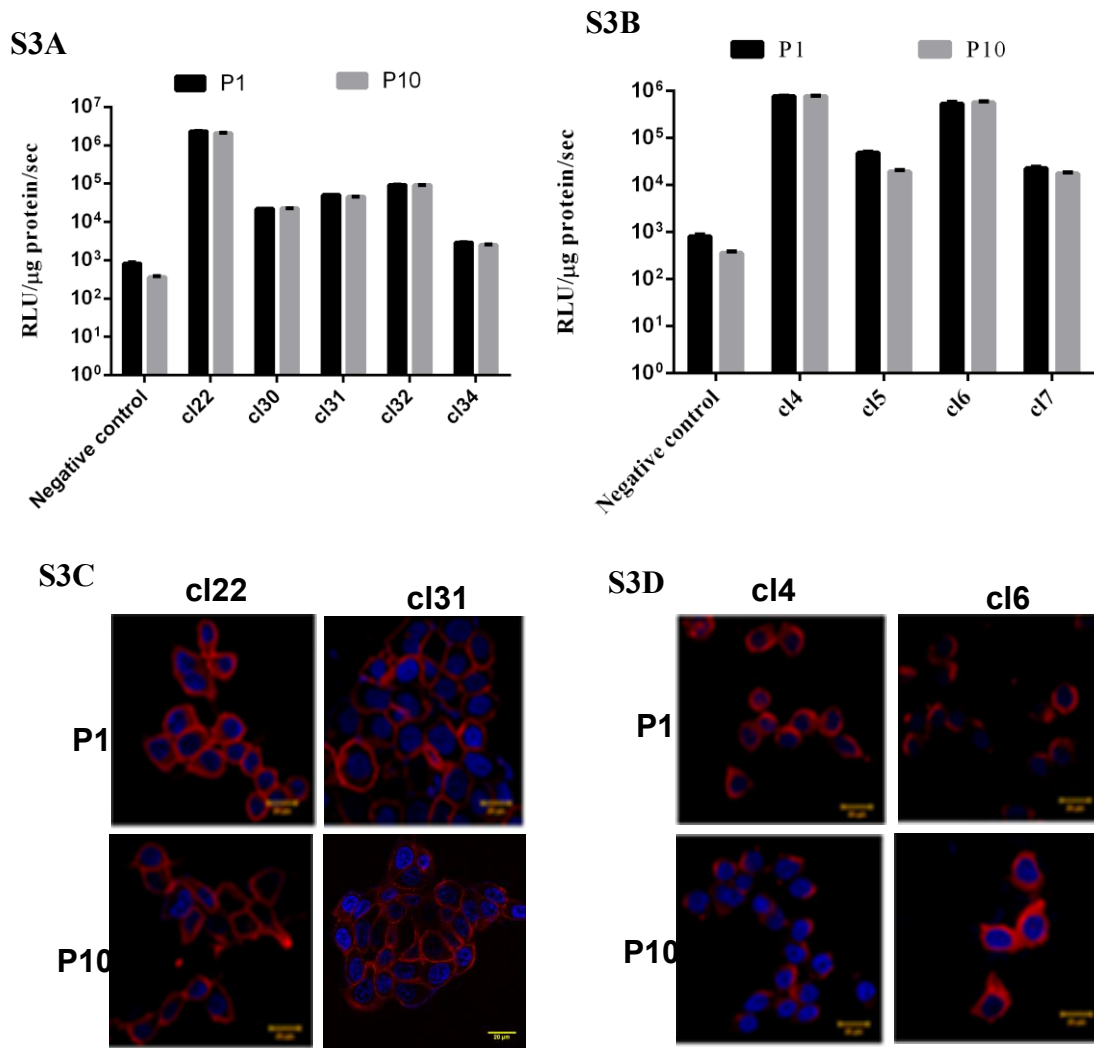

**Figure S3: Stable expression of NIS in the clonal cell models is maintained over long passages.** S3A-B. Luciferase assay showing relative light output normalized to protein concentration of Fl2 activity in membrane and cytoplasmic NIS overexpressing clones across passage 1 and passage 10 S3C-D. IF images showing the localization of NIS in membrane clones and cytoplasmic clones across passage 1 to 10. NIS stained with Dylight 633 secondary antibody (red) and nucleus staining by DAPI (blue). The scale bar represents 20μm.

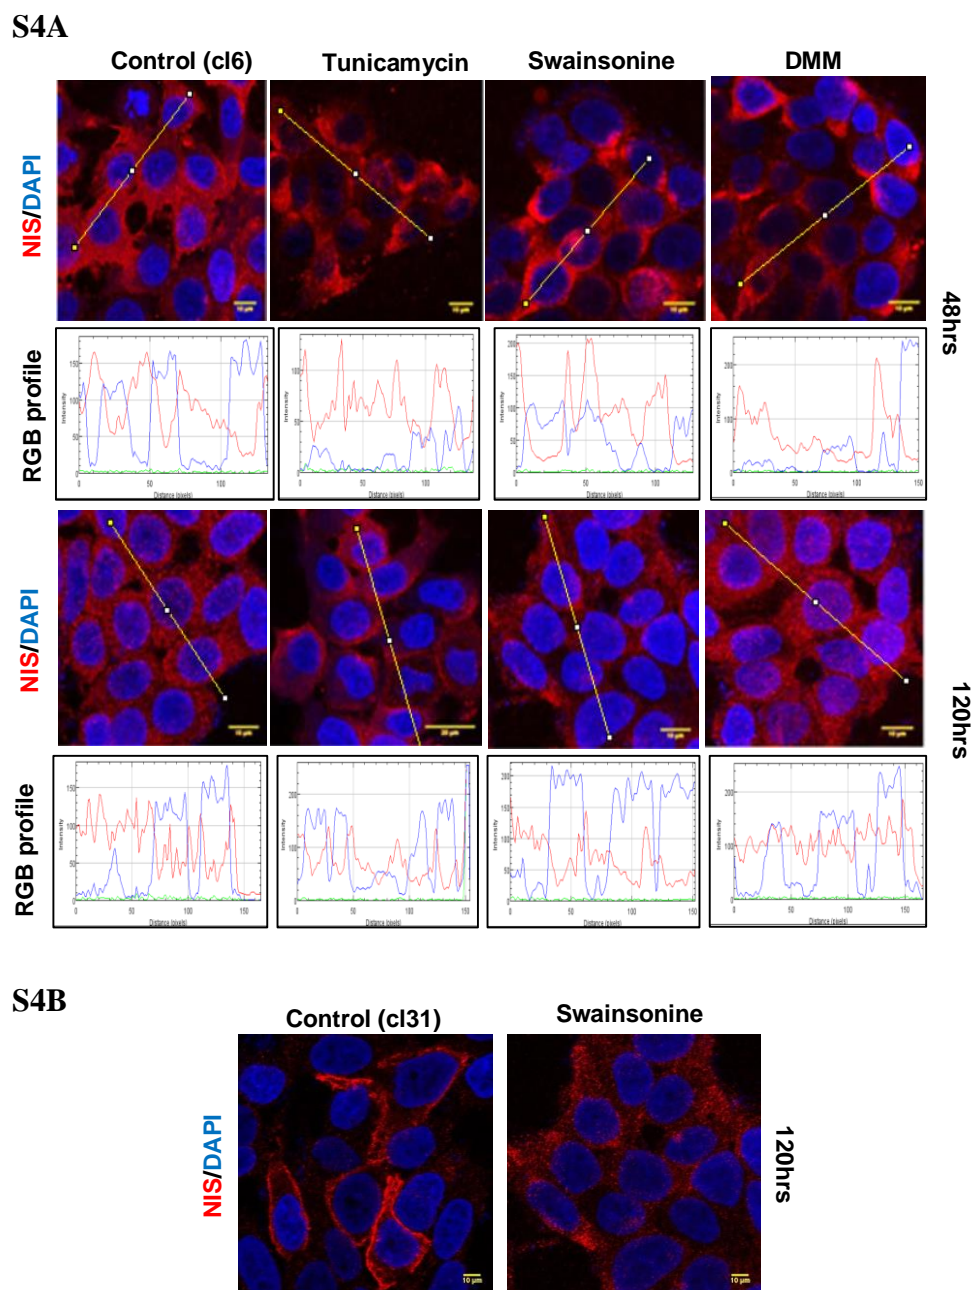

**Figure S4: The effect glycosylation inhibitors on NIS localization in cytoplasmic clones, and the action of swainsonine over 120 hours in cl31.** NIS localization in cytoplasmic clone is not affected by glycosylation inhibitor treatment and swainsonine can take down membrane expression of NIS over 120 hours **S4A**. IF images showing the localization of NIS (red) in response to glycosylation inhibitors tunicamycin, DMM and swainsonine at 48 and 120 hours in cytoplasmic clone. **S4B**. IF images showing the delayed action of swainsonine on altering NIS (red) localization over 120 hours. The scale bar represents 10µm

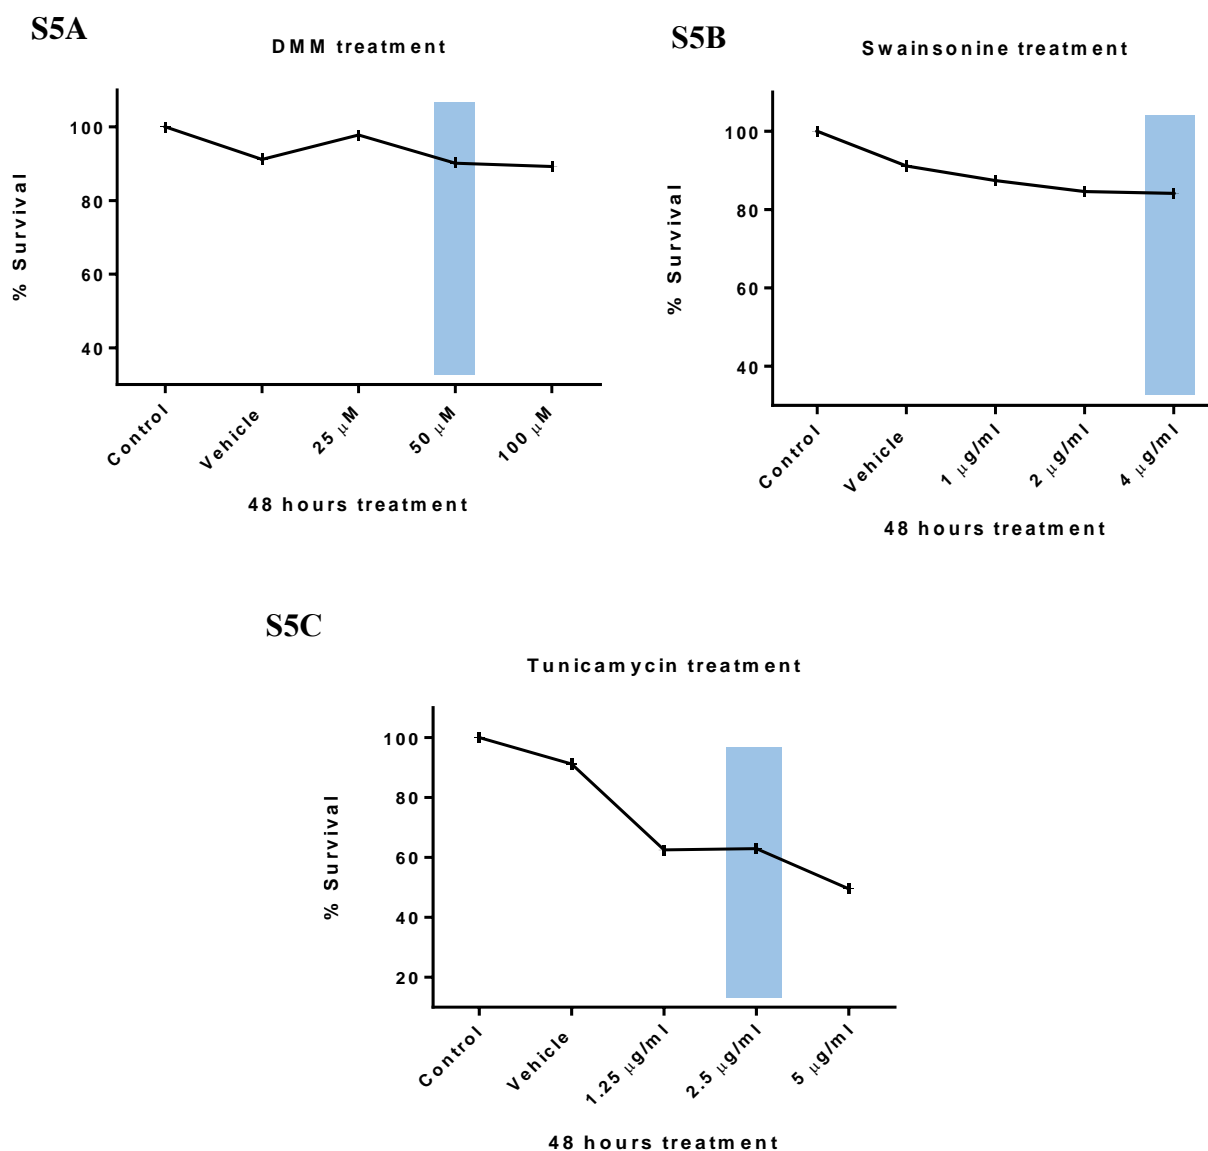

**Figure S5: Cytotoxicity of glycosylation inhibitors on MCF-7 cells.** The glycosylation pathway inhibitors used are not cytotoxic to MCF-7 cells. **S5A-C:** Graph showing the results from MTT assay, revealing that the selected dose of each drug for the study (highlighted in blue), lies below IC50.

S6A

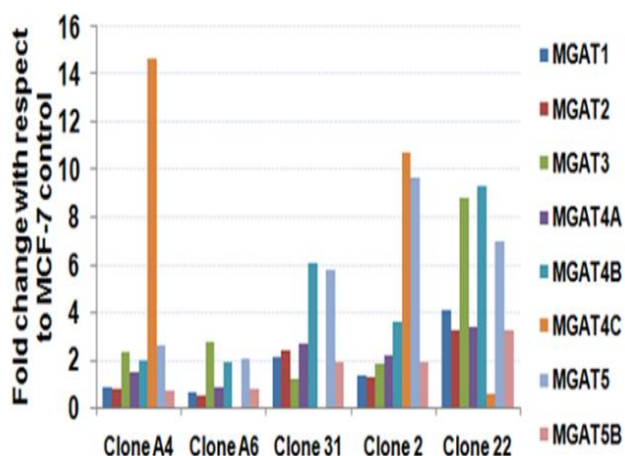

S6B

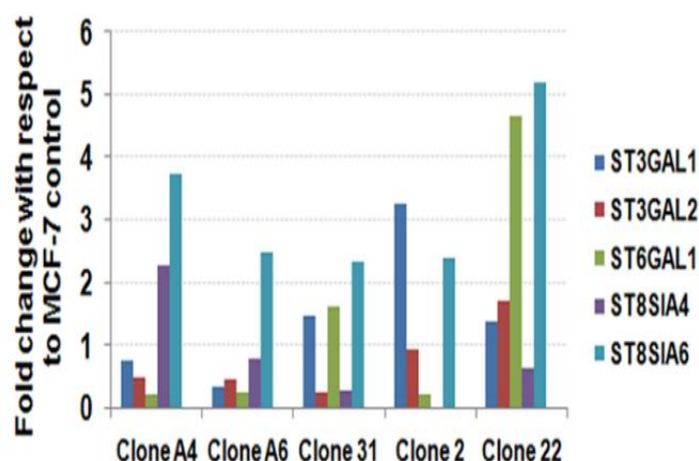

S6C

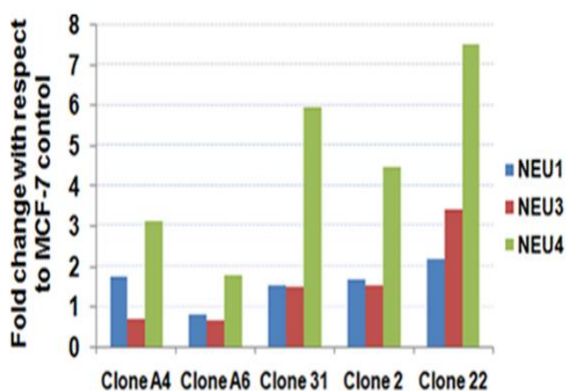

**Figure S6: Expression of various class of glycosylation enzyme coding genes across clonal models and MCF-7 baseline cell.** Differential expression of various class of glycosylation enzyme coding genes across membrane and cytoplasmic clone w.r.t to baseline cells **S6A**. Chart showing fold change for various mannosyl transferase enzyme coding genes in membrane and cytoplasmic clones with respect to baseline MCF-7 cell. **S6B**. Chart showing differential expression profile of sialidases enzyme coding genes. **S6C**. Chart showing differential expression profile of neuraminidase enzyme coding genes.

S7A

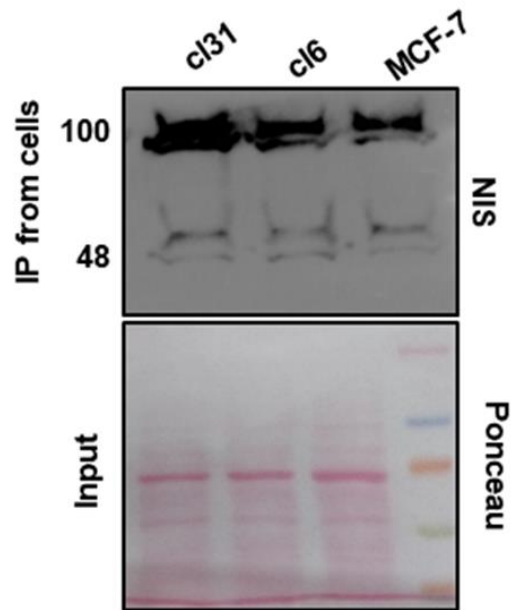

**Figure S7: NIS western blot showing effective pull down of NIS from the clonal cell models.** Immunoprecipitation of NIS from the different cell lineages reveals that cl31 possess the highest amount of 100kDa fraction of NIS. **S7A:** Western blot showing the staining of NIS from the IP sample, across the different cell types. Ponceau staining was used as a loading control from input samples.



**Table S1: Karyotype analysis of MCF-7 derived stable cell models of differential NIS localization.**

| Cell line                         | MCF-7 parent                                                                                                                                                                         | cl31                                                                                                                                                                                | cl6                                                                                                                                                                                 |
|-----------------------------------|--------------------------------------------------------------------------------------------------------------------------------------------------------------------------------------|-------------------------------------------------------------------------------------------------------------------------------------------------------------------------------------|-------------------------------------------------------------------------------------------------------------------------------------------------------------------------------------|
| <b>Ploidy</b>                     | Triploidy                                                                                                                                                                            | Triploidy                                                                                                                                                                           | Triploidy                                                                                                                                                                           |
| <b>Similar abnormalities</b>      | <ul style="list-style-type: none"> <li>• Derivative chromosome 1 due to inversion and duplication of chromosome</li> <li>• Isochromosomes of q arm of chromosome 7 and 11</li> </ul> | <ul style="list-style-type: none"> <li>• Derivative chromosome 1 due to inversion or duplication of chromosome</li> <li>• Isochromosomes of q arm of chromosome 7 and 11</li> </ul> | <ul style="list-style-type: none"> <li>• Derivative chromosome 1 due to inversion or duplication of chromosome</li> <li>• Isochromosomes of q arm of chromosome 7 and 11</li> </ul> |
| <b>Differential abnormalities</b> | <p>Deletion in p/q arm of chromosome 1,2,3,6,11,17</p> <p>Extra copies of chromosomes 7,8,9,10,11,13,14,15,16,17</p>                                                                 | <p>Deletion in p/q arm of chromosome 1,6,8,11,17</p> <p>Extra copies of chromosomes 4,5,7,8,9,10,11,13,15,16,17,20,22</p>                                                           | <p>Deletion in p/q arm of chromosome 1,2,3,6,8,11,17</p> <p>Extra copies of chromosomes 4,5,7,8,9,10,11,13,14,15,16,17,20</p>                                                       |

**Table S1:** Clonal heterogeneity among MCF-7 clones based on karyotype differences. GTG banding pattern has been used to evaluate the chromosome structures and numbers.
